# Supplementary material for: A new risk model comprising genes highly correlated with CD133 identifies different tumor-immune microenvironment subtypes impacting prognosis in hepatocellular carcinoma
Source: Aging (Albany NY). 2020 Jun 20;12(12):12234–50. doi: 10.18632/aging.103409 (PMC7343494; doi:10.18632/aging.103409)
Supplement: Supplementary Tables [file aging-12-103409-s001..pdf]

## SUPPLEMENTARY TABLES

**Supplementary Table 1. Significance and HR of the optimal genes associated with OS.**

| Gene names | Coef    | HR     | P value |
|------------|---------|--------|---------|
| LGALS3     | 0.1376  | 1.1476 | 0.009   |
| RFX6       | 0.1089  | 1.1151 | 0.029   |
| ADH6       | -0.0895 | 0.9144 | 0.032   |
| UCLH1      | 0.0742  | 1.077  | 0.009   |

\*HR, Hazard ratio; OS, overall survival; Coef, relative coefficient

**Supplementary Table 2. Annotation of the significant enriched GSEA datasets.**

| Gene sets name                                             | Description                                                                                                                                                                                           |
|------------------------------------------------------------|-------------------------------------------------------------------------------------------------------------------------------------------------------------------------------------------------------|
| WOO_LIVER_CANCER_RECURRENCE_UP                             | Genes positively correlated with recurrence free survival in patients with hepatitis B-related (HBV) hepatocellular carcinoma (HCC);                                                                  |
| ANASTASSIOU_MULTICANCER_INVASIVENESS_SIGNATURE             | Invasiveness signature resulting from cancer cell/microenvironment interaction;                                                                                                                       |
| CHIANG_LIVER_CANCER_SUBCLASS_CTNNB1_DN                     | Top 200 marker genes down-regulated in the 'CTNNB1' subclass of hepatocellular carcinoma (HCC);                                                                                                       |
| CHIANG_LIVER_CANCER_SUBCLASS_PROLIFERATION_UP              | Top 200 marker genes up-regulated in the 'proliferation' subclass of hepatocellular carcinoma (HCC); characterized by increased proliferation, high levels of serum AFP, and chromosomal instability; |
| LU_TUMOR_VASCULATURE_UP                                    | Genes up-regulated in endothelial cells derived from invasive ovarian cancer tissue<br>Genes up-regulated in endothelial cells derived from invasive ovarian cancer tissue;                           |
| REACTOME_INTERLEUKIN_10_SIGNALING                          | Interleukin-10 signaling                                                                                                                                                                              |
| GO_REGULATION_OF_MONONUCLEAR_CELL_MIGRATION                | Any process that modulates the rate, frequency or extent of mononuclear cell migration.                                                                                                               |
| HALLMARK_EPITHELIAL_MESENCHYMAL_TRANSITION                 | Genes defining epithelial-mesenchymal transition, as in wound healing, fibrosis and metastasis.                                                                                                       |
| HALLMARK_INFLAMMATORY_RESPONSE                             | Genes defining inflammatory response                                                                                                                                                                  |
| GSE7218_UNSTIM_VS_ANTIGEN_STIM_THROUGH_IGG_B_CELL_DN       | Genes down-regulated in B lymphocytes: expressing IgM BCR fusion and untreated versus expressing IgMG BCR fusion and treated by anti-HEL.                                                             |
| GSE25123_CTRL_VS_ROSIGLITAZONE_STIM_PPARG_KO_MACROPHAGE_UP | > Genes up-regulated in bone marrow-derived macrophages with PPARG [knockout: control versus rosiglitazone                                                                                            |
| GSE36888_UNTREATED_VS_IL2_TREATED_TCELL_17H_DN             | GSE36888_UNTREATED_VS_IL2_TREATED_TCELL_17H_DN                                                                                                                                                        |

\* False Discovery Rate (FDR) <0.25 and P-value of the gene sets < 0.05 was considered statistically significant.
